# Supplementary material for: Efficacy and Safety of Udenafil Once Daily in Patients with Erectile Dysfunction after Bilateral Nerve-Sparing Robot-Assisted Laparoscopic Radical Prostatectomy: A Randomized, Double-Blind, Placebo-Controlled Study
Source: PubMed Central journal article supplement — World J Mens Health. 2022 Sep 2;41(3):612–22. doi: 10.5534/wjmh.220057 (PMC10307658; doi:10.5534/wjmh.220057), 2022-09-02
Supplement: wjmh-41-612-s001.pdf [file wjmh-41-612-s001.pdf]

**Supplement Table 1.** Erectile function questionnaire

---

- Q1 Are you currently able to achieve erection?  
 0 Impossible  
 1 Possible
- Q2 What is the current level of erection compared to that before the diagnosis of prostate cancer?  
※ Current level when 100% before diagnosis of prostate cancer  
\_\_\_\_\_ %
- Q3 Are you currently able to have an erection adequate for sexual intercourse?  
 0 Impossible to have an erection or no sexual activity.  
 5 Always or almost always  
 4 Usually (over 50% of attempts)  
 3 Often (about 50% of attempts)  
 2 Sometimes (less than 50% of attempts)  
 1 Never
- Q4 How satisfied are you with your current sex life?  
 5 Very satisfied  
 4 Satisfied  
 3 Neither satisfied nor dissatisfied  
 2 dissatisfied  
 1 very dissatisfied
- Q5 Has the treatment improved your erectile function compared to that at last visit?  
 Yes  
 No
- Q6 Compared to the first visit after surgery, has the treatment improved your erectile function?  
 Yes  
 No
-
