# Supplementary material for: Efficacy and Safety of Udenafil Once Daily in Patients with Erectile Dysfunction after Bilateral Nerve-Sparing Robot-Assisted Laparoscopic Radical Prostatectomy: A Randomized, Double-Blind, Placebo-Controlled Study
Source: PubMed Central journal article supplement — World J Mens Health. 2022 Sep 2;41(3):612–22. doi: 10.5534/wjmh.220057 (PMC10307658; doi:10.5534/wjmh.220057), 2022-09-02
Supplement: wjmh-41-612-s002.pdf [file wjmh-41-612-s002.pdf]

**Supplement Table 2.** Results of laboratory investigations

| Result                                 | Baseline           |               |         | Visit 4            |               |         | p-value <sup>a</sup> |
|----------------------------------------|--------------------|---------------|---------|--------------------|---------------|---------|----------------------|
|                                        | Experimental group | Control group | p-value | Experimental group | Control group | p-value |                      |
| White blood cell, ×10 <sup>3</sup> /μL | 6.14±1.21          | 6.47±1.47     | 0.250   | 5.97±1.67          | 5.80±1.03     | 0.595   | 0.090                |
| Hemoglobin, g/dL                       | 13.83±1.17         | 14.02±1.07    | 0.505   | 14.41±1.19         | 14.62±0.85    | 0.395   | <0.001               |
| Hematocrit, %                          | 41.53±3.58         | 41.87±2.86    | 0.637   | 42.96±3.48         | 42.95±2.70    | 0.997   | <0.001               |
| Platelet, ×10 <sup>3</sup> /μL         | 244.30±59.60       | 239.07±54.59  | 0.676   | 234.15±51.54       | 233.67±43.57  | 0.968   | 0.026                |
| Sodium, mmol/L                         | 139.77±1.88        | 139.67±1.60   | 0.793   | 140.37±1.96        | 140.57±2.50   | 0.743   | 0.055                |
| Potassium, mmol/L                      | 4.32±0.37          | 4.24±0.31     | 0.314   | 4.41±0.26          | 4.40±0.36     | 0.916   | 0.001                |
| Chloride, mmol/L                       | 103.56±2.25        | 103.73±1.80   | 0.694   | 104.13±2.12        | 104.29±2.81   | 0.820   | 0.140                |
| AST, U/L                               | 23.55±9.00         | 23.77±5.92    | 0.888   | 22.85±6.49         | 22.33±4.98    | 0.713   | 0.844                |
| ALT, U/L                               | 23.59±15.19        | 26.30±12.96   | 0.376   | 21.80±10.65        | 23.19±6.37    | 0.577   | 0.434                |
| BUN, mg/dL                             | 15.32±3.98         | 15.62±3.81    | 0.730   | 15.73±3.56         | 16.73±3.95    | 0.318   | 0.078                |
| Creatinine, mg/dL                      | 0.89±0.16          | 0.85±0.11     | 0.231   | 0.94±0.15          | 0.92±0.14     | 0.608   | <0.001               |
| Total cholesterol, mg/dL               | 182.41±33.42       | 176.27±37.33  | 0.446   | 183.63±35.47       | 179.57±33.41  | 0.645   | 0.824                |
| Total protein, g/dL                    | 7.45±0.50          | 7.36±0.36     | 0.339   | 7.24±0.37          | 7.18±0.31     | 0.457   | <0.001               |
| Albumin, g/dL                          | 4.37±0.34          | 4.27±0.29     | 0.148   | 4.34±0.30          | 4.35±0.30     | 0.871   | 0.428                |
| Testosterone, ng/mL                    | 4.00±1.24          | 3.95±1.37     | 0.847   | 5.14±2.15          | 4.15±1.59     | 0.037   | <0.001               |

Values are presented as mean±standard deviation.

AST: aspartate aminotransferase, ALT: alanine aminotransferase, BUN: blood urea nitrogen.

Student's t-test, <sup>a</sup>Baseline vs. endpoint, dependent t-test.
