# Supplementary material for: Efficacy and Safety of Udenafil Once Daily in Patients with Erectile Dysfunction after Bilateral Nerve-Sparing Robot-Assisted Laparoscopic Radical Prostatectomy: A Randomized, Double-Blind, Placebo-Controlled Study
Source: PubMed Central journal article supplement — World J Mens Health. 2022 Sep 2;41(3):612–22. doi: 10.5534/wjmh.220057 (PMC10307658; doi:10.5534/wjmh.220057), 2022-09-02
Supplement: wjmh-41-612-s003.pdf [file wjmh-41-612-s003.pdf]

**Supplement Table 3.** Change of expanded prostate cancer index composite sexual assessment

| Question                                                                                                                | Visit4-Visit 1     |               |         |
|-------------------------------------------------------------------------------------------------------------------------|--------------------|---------------|---------|
|                                                                                                                         | Experimental group | Control group | p-value |
| 1. How would you rate each of the following during the last 4 weeks?                                                    |                    |               |         |
| a. Your level of sexual desire?                                                                                         | 0.35±1.30          | 0.18±1.30     | 0.607   |
| b. Your ability to have an erection?                                                                                    | 0.67±1.15          | 0.27±0.63     | 0.135   |
| c. Your ability to reach orgasm?                                                                                        | 0.81±1.26          | 0.18±0.73     | 0.032   |
| 2. How would you describe the usual QUALITY of your erections during the last 4 weeks?                                  | 1.04±1.09          | 0.68±0.72     | 0.097   |
| 3. How would you describe the FREQUENCY of your erections during the last 4 weeks?                                      | 1.16±1.44          | 0.73±0.98     | 0.200   |
| 4. How often have you awakened in the morning or night with an erection during the last 4 weeks?                        | 0.46±1.15          | 0.41±0.91     | 0.849   |
| 5. During the last 4 weeks, how often did you have any sexual activity?                                                 | 0.70±1.02          | 0.59±0.80     | 0.611   |
| 6. During the last 4 weeks, how often did you have sexual intercourse?                                                  | 0.72±0.88          | 0.59±0.80     | 0.537   |
| 7. Overall, how would you rate your ability to function sexually during the last 4 weeks?                               | 0.74±1.23          | 0.41±0.80     | 0.169   |
| 8. How big a problem during the last 4 weeks, if any, has each of the following been for you?                           |                    |               |         |
| a. Your level of sexual desire?                                                                                         | -0.47±1.79         | 0.41±1.56     | 0.046   |
| b. Your ability to have an erection                                                                                     | -0.70±1.55         | 0.18±1.26     | 0.012   |
| c. Your ability to reach an orgasm                                                                                      | -0.53±1.63         | 0.09±1.54     | 0.124   |
| 9. Overall, how big a problem has your sexual function or lack of sexual function been for you during the last 4 weeks? | -0.67±1.61         | 0.27±1.24     | 0.008   |

Values are presented as mean±standard deviation.  
Student's t-test.
